# Supplementary figures and images for: Fabrication of Co3O4 nanoparticles-decorated graphene composite for determination of l-tryptophan
Source: Royal Society of Chemistry journal article supplement (doi:10.1039/c2an35175g), 2012-01-01

### Supporting information

Fig. S1

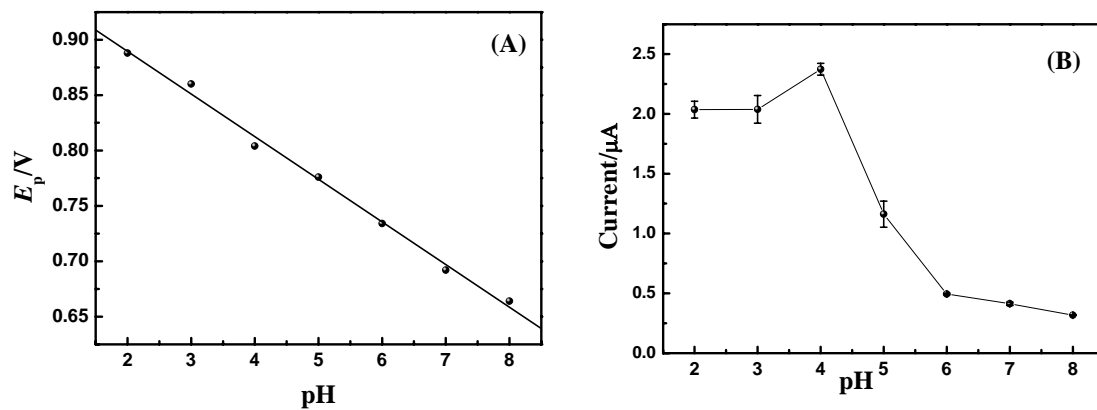

Fig. S2

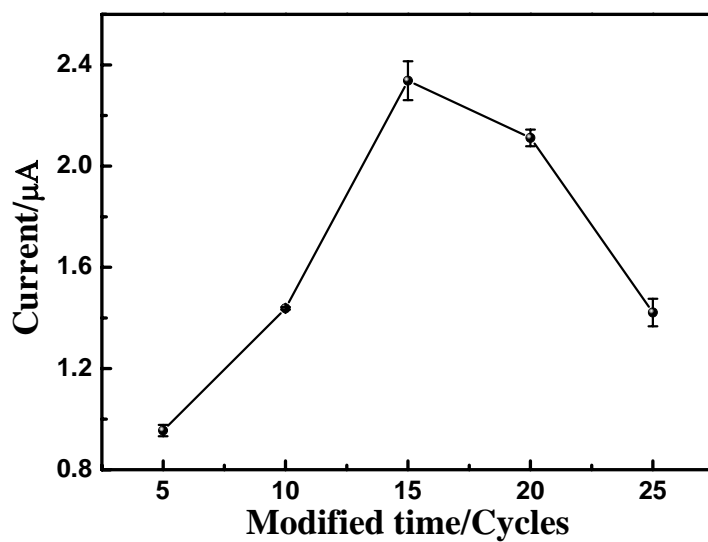

Supplement: c2an35175g.pdf [file c2an35175g.pdf]
